# Supplementary material for: Heterogenised N-heterocyclic carbene complexes: synthesis, characterisation and application for hydroformylation and C–C bond formation reactions
Source: Royal Society of Chemistry journal article supplement (doi:10.1039/c0dt00760a), 2010-11-30
Supplement: c0dt00760a.pdf [file c0dt00760a.pdf]

## Supporting Information

# Heterogenised N-Heterocyclic Carbene Complexes: Synthesis, Characterisation and Application for Hydroformylation and C–C Bond Formation Reactions

*Sarim Dastgir,<sup>\*‡a</sup> Karl S. Coleman<sup>b</sup> and Malcolm L. H. Green<sup>\*a</sup>*

<sup>\*a</sup> Inorganic Chemistry Laboratory, University of Oxford, South Parks Road, Oxford, OX1 3QR, UK.;

Tel: +44 (0) 1865 272600; Fax: +44 (0) 1865 272690;

<sup>b</sup> Department of Chemistry, Durham University, South Road, Durham, DH1 3LE, UK.

<sup>‡</sup> Present Address: Department of Chemistry, York University, 4700 Keele Street, Toronto, ON, M3J

2Z3, 10 Canada); Tel: +1 416 736 2100 Ext. 77720; Fax:+1 416 736 5936

E-mail: malcolm.green@chem.ox.ac.uk (Professor Malcolm L. H. Green, FRS.)

sarim.dastgir@lmh.oxon.org (Dr. Sarim Dastgir)

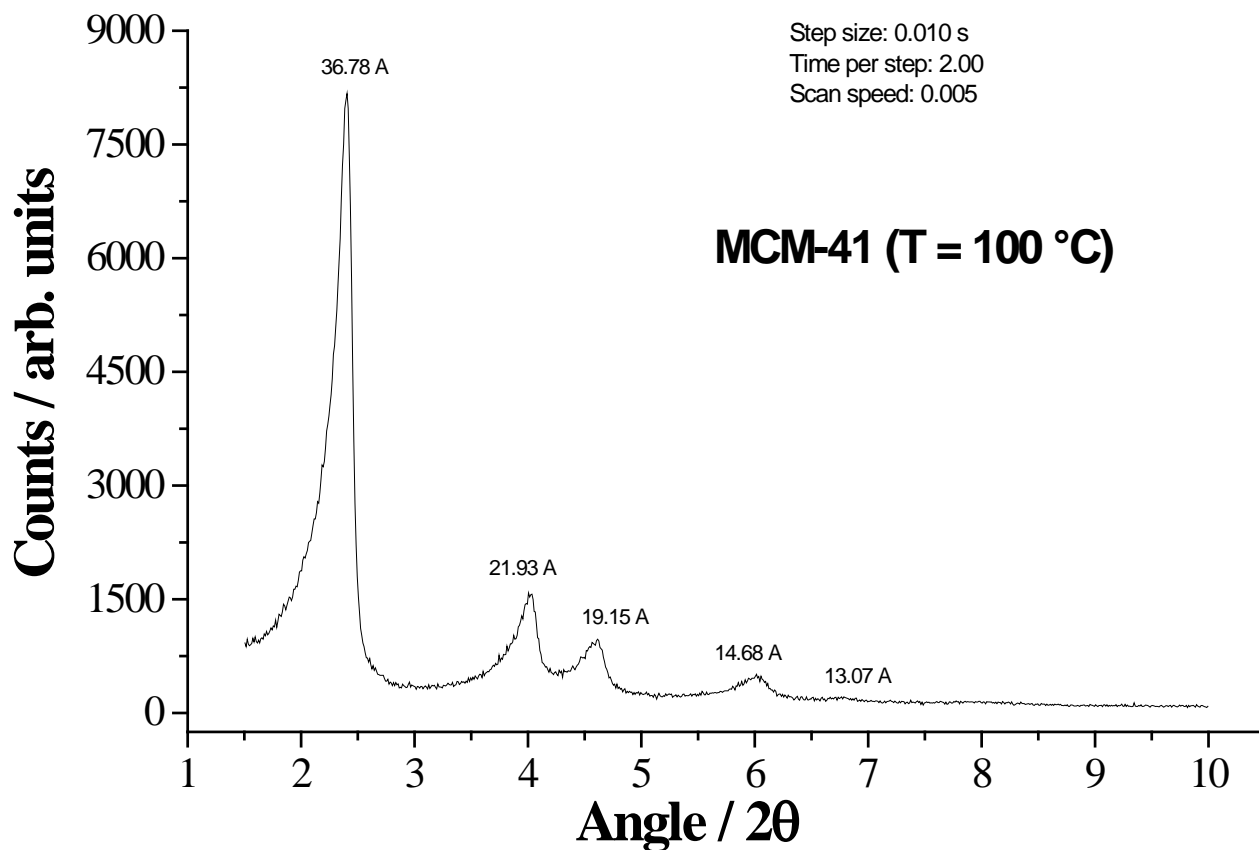

**Figure 1. Powder X-ray diffraction pattern for pure MCM-41**

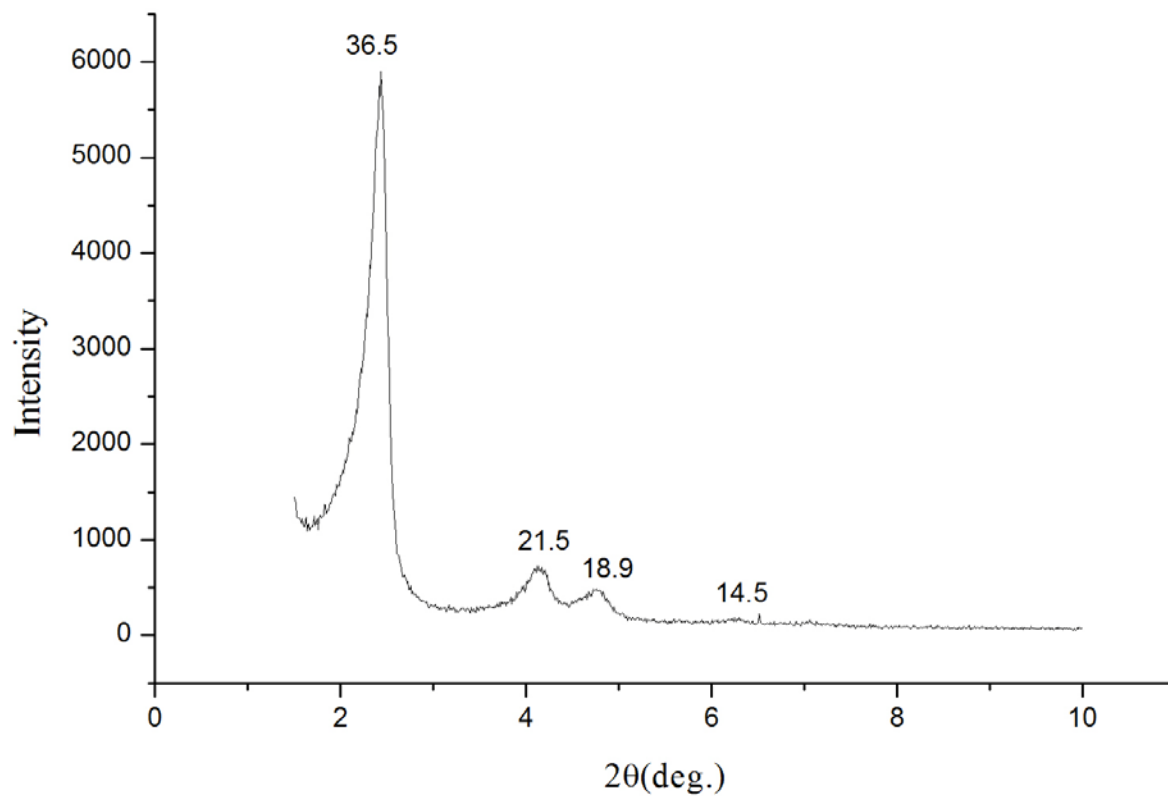

**Figure 2. Powder X-ray diffraction pattern for Chemically modified MCM-41**

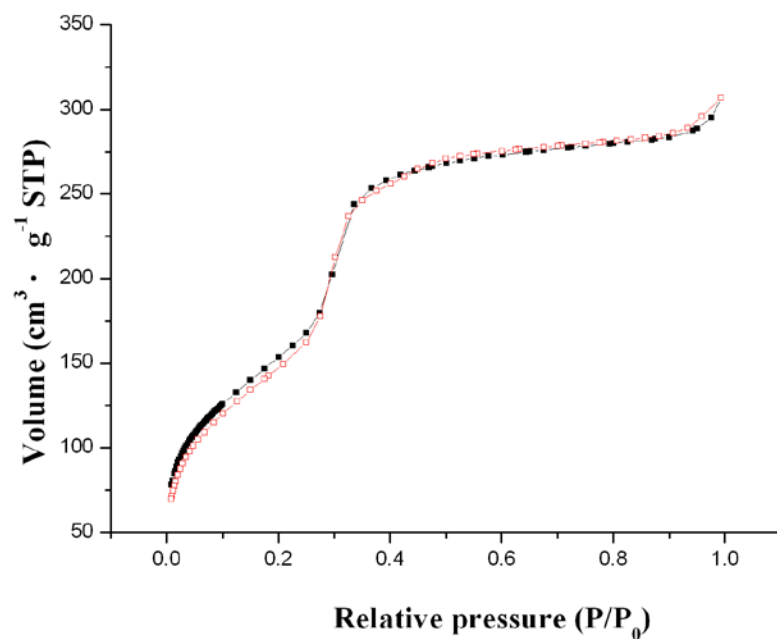

**Figure 3. Nitrogen adsorption-desorption isotherm of chemically modified MCM-41**

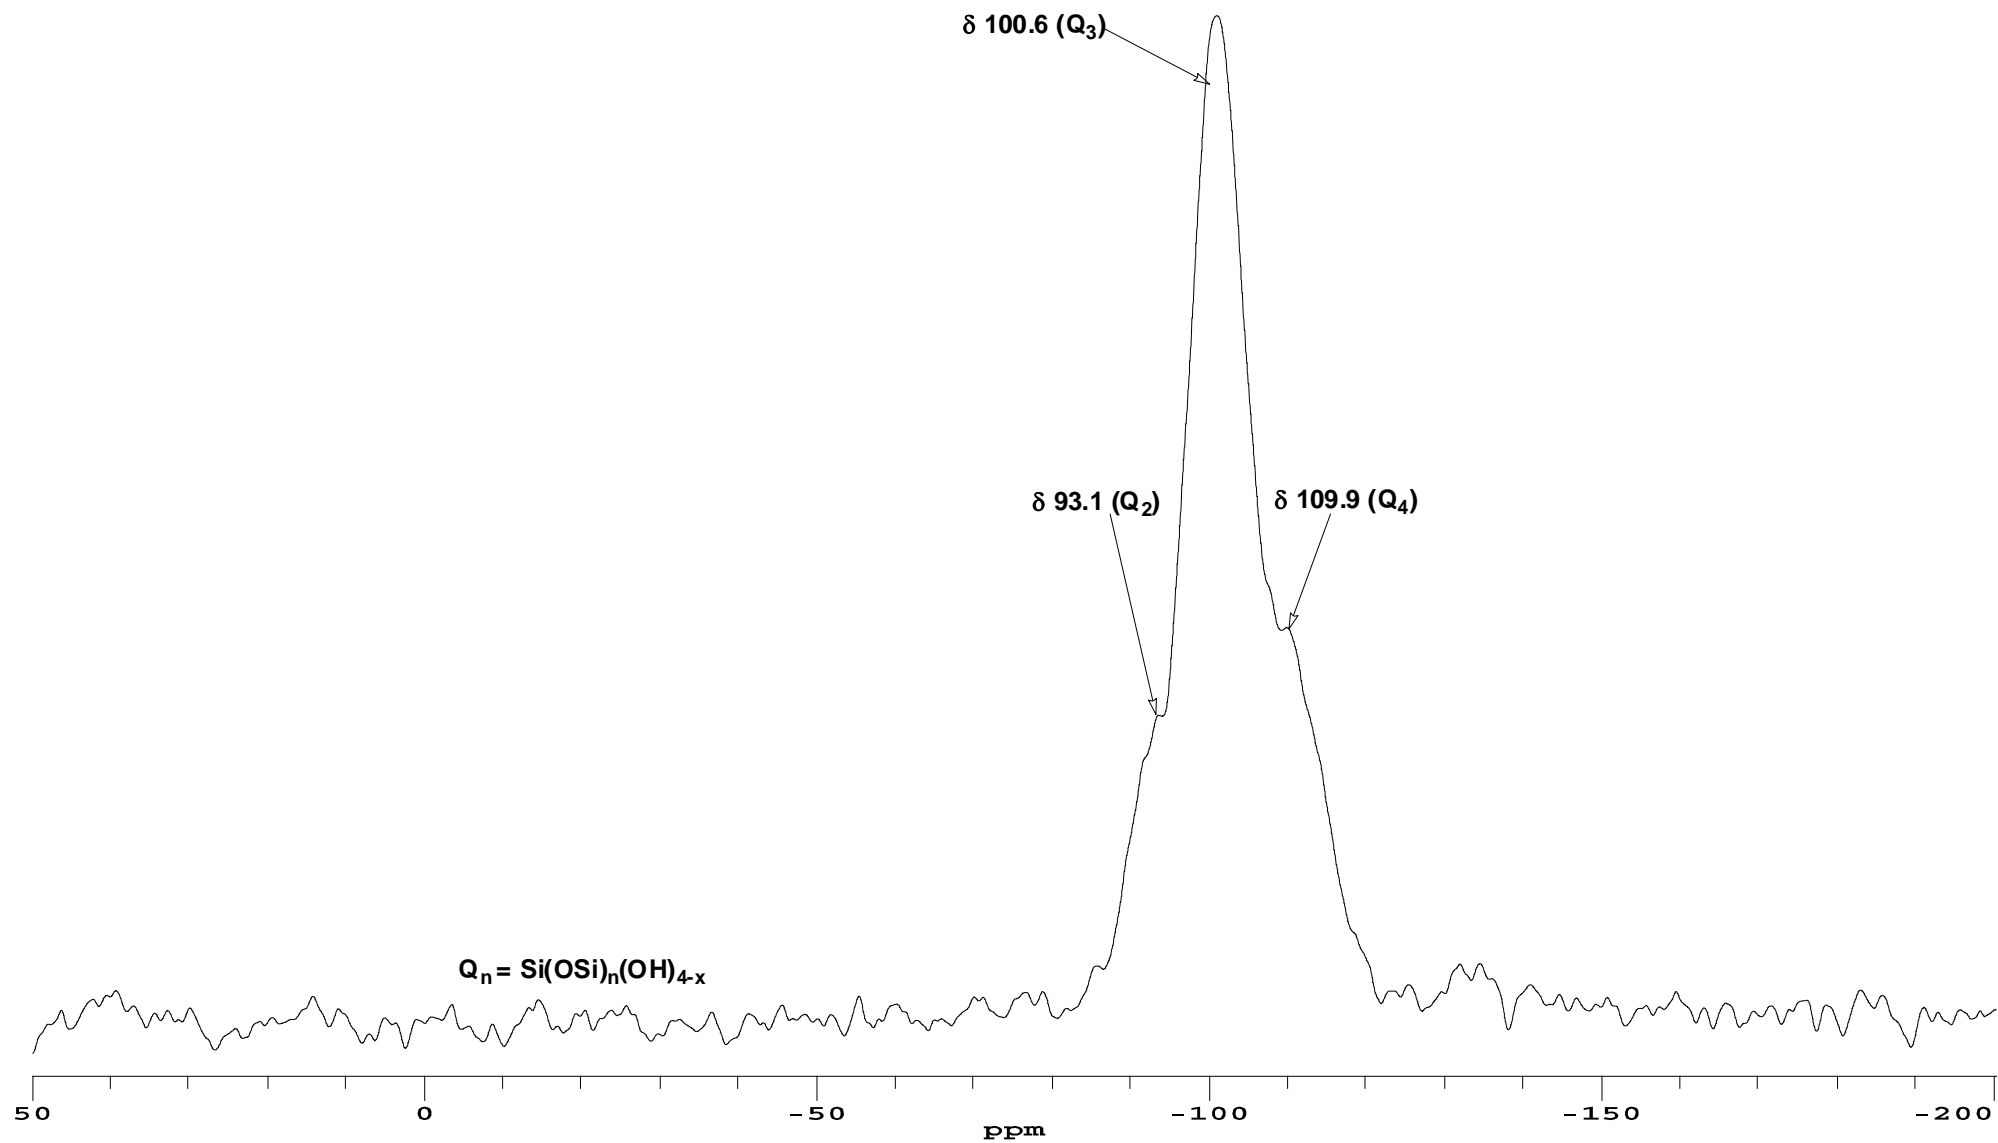

Figure 4.  $^{29}\text{Si}$  CP/MAS NMR of MCM-41

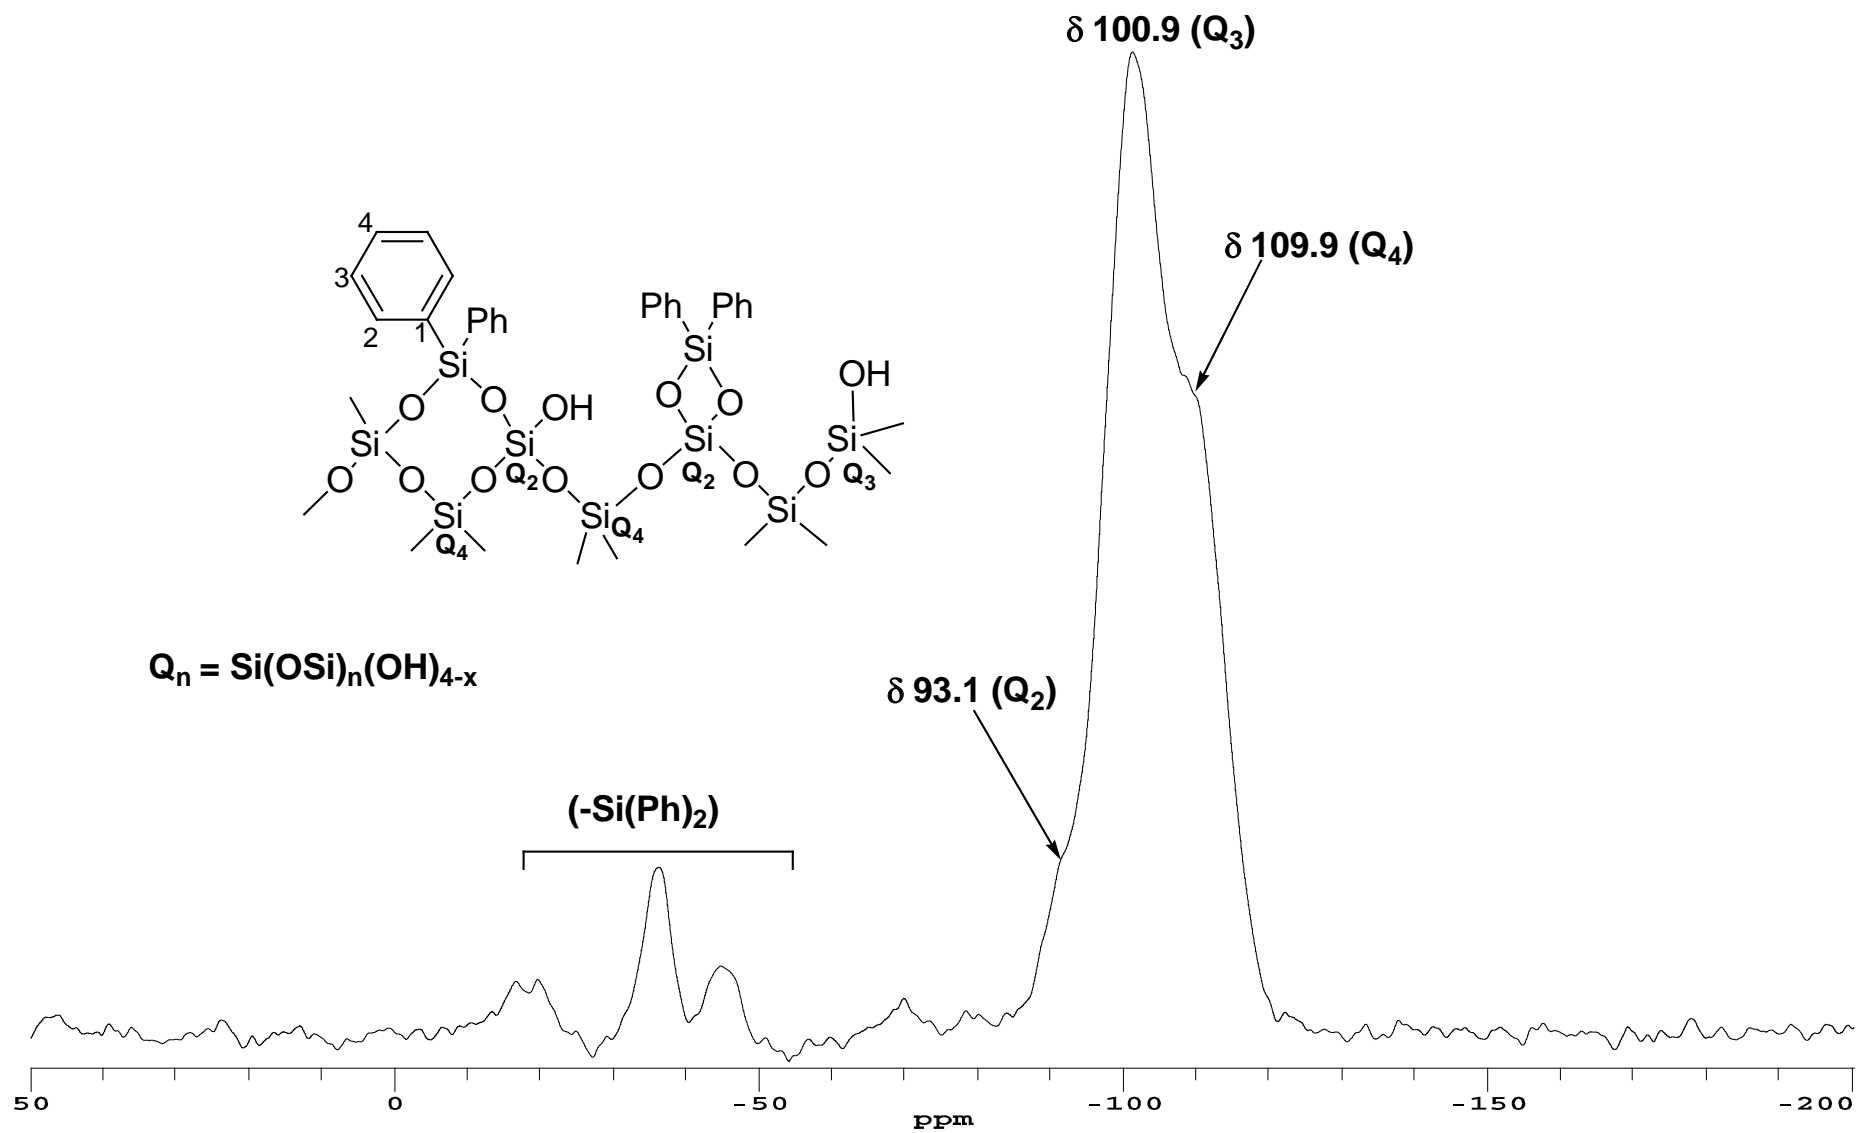

Figure 5.  $^{29}\text{Si}$  CP/MAS NMR of Chemically Modified MCM-41

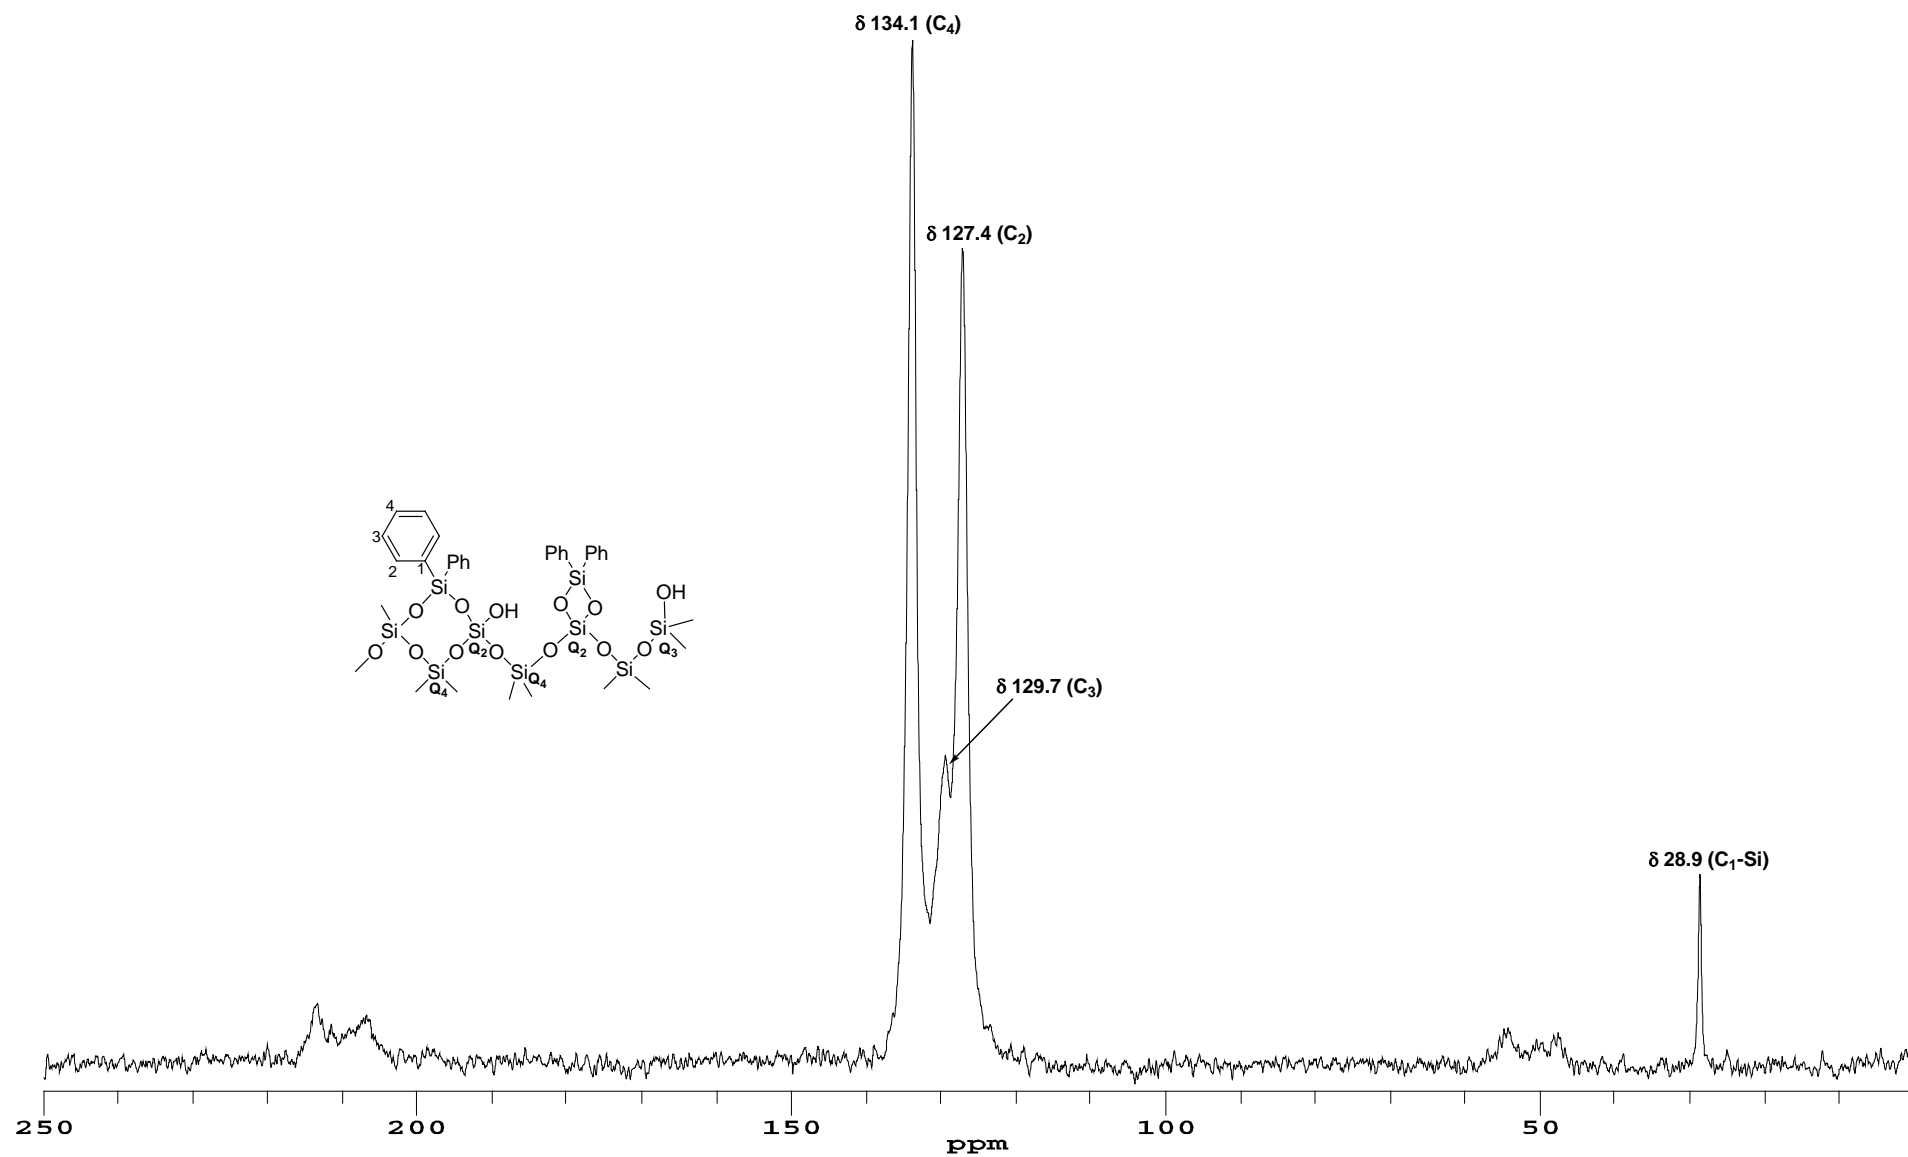

Figure 6.  $^{13}\text{C}\{^1\text{H}\}$  CP/MAS NMR of Chemically Modified MCM-41

## **Inorganic Chemistry Crystallography Service**

Department of Chemistry, University of Oxford

Chemistry Research Laboratory

Mansfield Road

Oxford, OX1 3TA



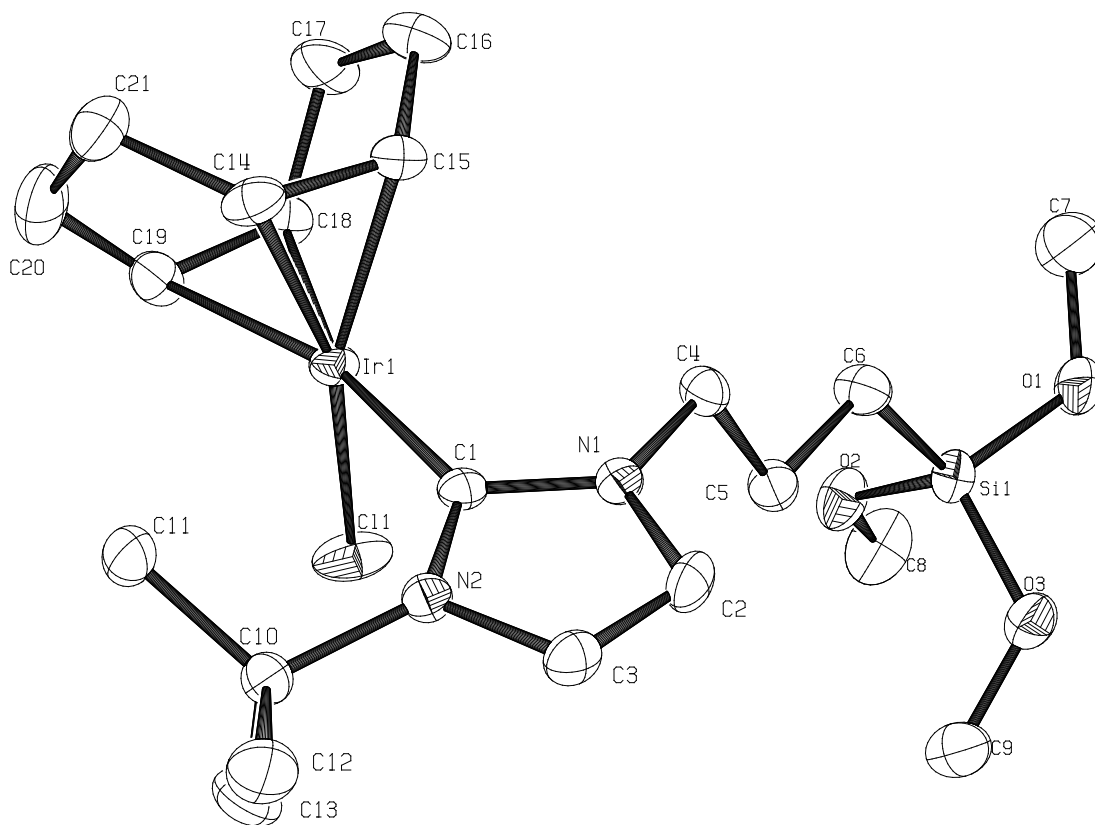

**H atoms not shown**

Crystals of Iridium complex 7b were grown from slow evaporation of concentrated benzene solution under constant flow of nitrogen.. A single crystal having dimensions approximately 0.08 x 0.08 x 0.22 mm was mounted on a glass fibre using perfluoropolyether oil and cooled rapidly to 150K in a stream of cold N<sub>2</sub> using an Oxford Cryosystems CRYOSTREAM unit. Diffraction data were measured using an Enraf-Nonius KappaCCD diffractometer (graphite-monochromated MoK<sub>α</sub> radiation,  $\lambda = 0.71073 \text{ \AA}$ ). Intensity data were processed using the DENZO-SMN package<sup>1</sup>.

The structure was solved in the space group  $P\bar{1}$  using the direct-methods program SIR92<sup>2</sup>, which located all non-hydrogen atoms. Subsequent full-matrix least-squares refinement was carried out using the CRYSTALS program suite<sup>3</sup>. Coordinates and anisotropic thermal parameters of all non-hydrogen atoms were refined. The hydrogen atoms of the coordinated alkene groups were located in a difference Fourier map and their coordinates and a common isotropic thermal parameter subsequently refined. Other hydrogen atoms were positioned geometrically after each cycle of refinement. A 3-term Chebychev polynomial weighting scheme was applied. Refinement converged satisfactorily to give  $R = 0.0311$ ,  $wR = 0.0341$ .

Attached is a thermal ellipsoid plot (ORTEP-3<sup>4</sup>) at 40% probability. A summary of crystallographic data is given below, as are full lists of atomic coordinates, anisotropic thermal parameters and those bond lengths and angles not concerning H atoms.

## References:

- 1 Z. Otwinowski and W. Minor, *Processing of X-ray Diffraction Data Collected in Oscillation Mode, Methods Enzymol.*, 1997, **276**, Eds C. W. Carter and R. M. Sweet, Academic Press.
- 2 A. Altomare, G. Cascarano, G. Giacovazzo, A. Guagliardi, M. C. Burla, G. Polidori and M. Camalli, *J. Appl. Cryst.* 1994, **27**, 435.
- 3 CRYSTALS Issue 12, P. W. Betteridge, J. R. Cooper, R. I. Cooper, K. Prout and D. J. Watkin, *J. Appl. Cryst.*, 2003, **36**, 1487
- 4 ORTEP-3 v. 1.0.2, C. K. Johnson and M. K. Burnett, 1998.

**Table 1: Crystal data and refinement details**

|                                                            |                                                                      |
|------------------------------------------------------------|----------------------------------------------------------------------|
| Crystal identification                                     | <b>(<math>\eta^4</math>-1,5-COD)(tmp<sup>t</sup>Bu)IrCl, 7b</b>      |
| Chemical formula                                           | C <sub>21</sub> H <sub>38</sub> ClIrN <sub>2</sub> O <sub>3</sub> Si |
| Formula weight                                             | 622.30                                                               |
| Temperature (K)                                            | 150                                                                  |
| Wavelength (Å)                                             | 0.71073                                                              |
| Crystal system                                             | Triclinic                                                            |
| Space group                                                | <i>P</i> $\bar{1}$                                                   |
| <i>a</i> (Å)                                               | 7.3574(2)                                                            |
| <i>b</i> (Å)                                               | 9.8123(3)                                                            |
| <i>c</i> (Å)                                               | 17.6344(5)                                                           |
| $\alpha$ (°)                                               | 97.7864(10)                                                          |
| $\beta$ (°)                                                | 99.9008(11)                                                          |
| $\gamma$ (°)                                               | 100.0573(13)                                                         |
| Cell volume (Å <sup>3</sup> )                              | 1216.74(6)                                                           |
| <i>Z</i>                                                   | 2                                                                    |
| Calculated density (Mg/m <sup>3</sup> )                    | 1.698                                                                |
| Absorption coefficient (mm <sup>-1</sup> )                 | 5.669                                                                |
| <i>F</i> <sub>000</sub>                                    | 620                                                                  |
| Crystal size (mm)                                          | 0.08 x 0.08 x 0.22 mm                                                |
| Description of crystal                                     | Yellow prism                                                         |
| Absorption correction                                      | Semi-empirical from equivalent reflections                           |
| Transmission coefficients (min,max)                        | 0.27, 0.64                                                           |
| $\theta$ range for data collection (°)                     | 5.0 ≤ $\theta$ ≤ 27.5                                                |
| Index ranges                                               | -9 ≤ <i>h</i> ≤ 9, -12 ≤ <i>k</i> ≤ 12, 0 ≤ <i>l</i> ≤ 22            |
| Reflections measured                                       | 14106                                                                |
| Unique reflections                                         | 5525                                                                 |
| <i>R</i> <sub>int</sub>                                    | 0.044                                                                |
| Observed reflections ( <i>I</i> > 3 $\sigma$ ( <i>I</i> )) | 4674                                                                 |
| Refinement method                                          | Full-matrix least-squares on <i>F</i>                                |
| Parameters refined                                         | 275                                                                  |
| Weighting scheme                                           | Chebychev 3-term polynomial                                          |

|                                                         |             |
|---------------------------------------------------------|-------------|
| Goodness of fit                                         | 1.0899      |
| R                                                       | 0.0311      |
| wR                                                      | 0.0341      |
| Residual electron density (min,max) (eÅ <sup>-3</sup> ) | -1.33, 1.30 |

**Table 2: Atomic coordinates and equivalent isotropic thermal parameters ( $\text{\AA}^2$ ) of non-hydrogen atoms**

| Atom  | x           | y            | z            | $U_{\text{equiv}}$ |
|-------|-------------|--------------|--------------|--------------------|
| Ir(1) | 0.53509(3)  | 0.296987(18) | 0.308514(11) | 0.0227             |
| Cl(1) | 0.6960(2)   | 0.26680(14)  | 0.20472(9)   | 0.0456             |
| C(1)  | 0.5169(6)   | 0.4950(5)    | 0.2869(3)    | 0.0209             |
| N(1)  | 0.3701(5)   | 0.5193(4)    | 0.2361(2)    | 0.0235             |
| C(2)  | 0.3896(7)   | 0.6598(5)    | 0.2308(3)    | 0.0299             |
| C(3)  | 0.5490(7)   | 0.7262(5)    | 0.2787(3)    | 0.0285             |
| N(2)  | 0.6300(5)   | 0.6251(4)    | 0.3142(2)    | 0.0231             |
| C(4)  | 0.2140(7)   | 0.4102(5)    | 0.1886(3)    | 0.0279             |
| C(5)  | 0.2252(7)   | 0.3842(5)    | 0.1030(3)    | 0.0301             |
| C(6)  | 0.0463(8)   | 0.2798(6)    | 0.0564(3)    | 0.0349             |
| Si(1) | 0.0215(2)   | 0.23857(15)  | -0.05049(8)  | 0.0307             |
| O(1)  | -0.1978(6)  | 0.1832(5)    | -0.0934(2)   | 0.0461             |
| C(7)  | -0.3263(11) | 0.0847(9)    | -0.0653(5)   | 0.0694             |
| O(2)  | 0.1471(6)   | 0.1217(4)    | -0.0677(2)   | 0.0425             |
| C(8)  | 0.1466(13)  | 0.0577(8)    | -0.1449(4)   | 0.0609             |
| O(3)  | 0.0822(6)   | 0.3730(4)    | -0.0923(2)   | 0.0408             |
| C(9)  | 0.2744(9)   | 0.4370(7)    | -0.0899(4)   | 0.0469             |
| C(10) | 0.8278(6)   | 0.6593(5)    | 0.3603(3)    | 0.0256             |
| C(11) | 0.8494(8)   | 0.5758(6)    | 0.4268(3)    | 0.0394             |
| C(12) | 0.8803(8)   | 0.8161(6)    | 0.3959(4)    | 0.0403             |
| C(13) | 0.9572(8)   | 0.6259(7)    | 0.3047(4)    | 0.0439             |
| C(14) | 0.4666(8)   | 0.3327(5)    | 0.4200(3)    | 0.0308             |
| C(15) | 0.3002(7)   | 0.2877(5)    | 0.3622(3)    | 0.0265             |
| C(16) | 0.1771(8)   | 0.1415(6)    | 0.3476(3)    | 0.0373             |
| C(17) | 0.2838(8)   | 0.0257(6)    | 0.3323(4)    | 0.0454             |
| C(18) | 0.4627(8)   | 0.0706(5)    | 0.3028(3)    | 0.0329             |
| C(19) | 0.6338(7)   | 0.1241(5)    | 0.3531(4)    | 0.0362             |
| C(20) | 0.6705(10)  | 0.1493(7)    | 0.4393(4)    | 0.0533             |
| C(21) | 0.5457(9)   | 0.2379(7)    | 0.4746(4)    | 0.0480             |

**Table 3: Atomic coordinates and isotropic thermal parameters ( $\text{\AA}^2$ ) of hydrogen atoms**

| Atom   | x        | y        | z        | $U_{\text{iso}}$ |
|--------|----------|----------|----------|------------------|
| H(1)   | 0.493(8) | 0.428(7) | 0.438(3) | 0.031(7)         |
| H(2)   | 0.258(8) | 0.362(6) | 0.351(3) | 0.031(7)         |
| H(3)   | 0.482(8) | 0.034(6) | 0.249(4) | 0.031(7)         |
| H(4)   | 0.743(9) | 0.117(6) | 0.335(3) | 0.031(7)         |
| H(21)  | 0.3004   | 0.7035   | 0.1971   | 0.0381           |
| H(31)  | 0.6021   | 0.8294   | 0.2879   | 0.0354           |
| H(41)  | 0.0926   | 0.4402   | 0.1931   | 0.0327           |
| H(42)  | 0.2165   | 0.3206   | 0.2094   | 0.0327           |
| H(51)  | 0.2348   | 0.4749   | 0.0826   | 0.0364           |
| H(52)  | 0.3388   | 0.3439   | 0.0970   | 0.0364           |
| H(61)  | -0.0648  | 0.3197   | 0.0669   | 0.0407           |
| H(62)  | 0.0434   | 0.1895   | 0.0770   | 0.0407           |
| H(71)  | -0.4531  | 0.0656   | -0.1006  | 0.0766           |
| H(72)  | -0.3364  | 0.1246   | -0.0113  | 0.0766           |
| H(73)  | -0.2793  | -0.0048  | -0.0644  | 0.0766           |
| H(81)  | 0.2324   | -0.0109  | -0.1431  | 0.0750           |
| H(82)  | 0.1912   | 0.1315   | -0.1752  | 0.0750           |
| H(83)  | 0.0157   | 0.0074   | -0.1707  | 0.0750           |
| H(91)  | 0.2779   | 0.5174   | -0.1194  | 0.0558           |
| H(92)  | 0.3403   | 0.4723   | -0.0344  | 0.0558           |
| H(93)  | 0.3390   | 0.3661   | -0.1143  | 0.0558           |
| H(111) | 0.9828   | 0.6010   | 0.4564   | 0.0441           |
| H(112) | 0.7634   | 0.5985   | 0.4627   | 0.0441           |
| H(113) | 0.8165   | 0.4731   | 0.4050   | 0.0441           |
| H(121) | 1.0124   | 0.8390   | 0.4267   | 0.0460           |
| H(122) | 0.7923   | 0.8382   | 0.4311   | 0.0460           |
| H(123) | 0.8703   | 0.8734   | 0.3531   | 0.0460           |
| H(131) | 1.0906   | 0.6479   | 0.3341   | 0.0538           |
| H(132) | 0.9447   | 0.6839   | 0.2624   | 0.0538           |
| H(133) | 0.9213   | 0.5240   | 0.2811   | 0.0538           |
| H(161) | 0.1211   | 0.1289   | 0.3946   | 0.0431           |
| H(162) | 0.0741   | 0.1337   | 0.3012   | 0.0431           |
| H(171) | 0.3179   | -0.0102  | 0.3822   | 0.0537           |
| H(172) | 0.1990   | -0.0516  | 0.2923   | 0.0537           |
| H(201) | 0.8048   | 0.1985   | 0.4590   | 0.0621           |
| H(202) | 0.6499   | 0.0563   | 0.4571   | 0.0621           |
| H(211) | 0.6216   | 0.2987   | 0.5238   | 0.0572           |
| H(212) | 0.4376   | 0.1735   | 0.4869   | 0.0572           |

**Table 4: Anisotropic thermal parameters ( $\text{\AA}^2$ )**

| Atom  | $U_{11}$   | $U_{22}$   | $U_{33}$    | $U_{23}$   | $U_{13}$    | $U_{12}$    |
|-------|------------|------------|-------------|------------|-------------|-------------|
| Ir(1) | 0.02356(9) | 0.01796(9) | 0.02918(10) | 0.00628(6) | 0.00943(6)  | 0.00497(6)  |
| Cl(1) | 0.0630(9)  | 0.0315(6)  | 0.0585(9)   | 0.0133(6)  | 0.0432(8)   | 0.0181(6)   |
| C(1)  | 0.022(2)   | 0.022(2)   | 0.021(2)    | 0.0041(16) | 0.0094(17)  | 0.0052(16)  |
| N(1)  | 0.0229(18) | 0.0223(18) | 0.0261(19)  | 0.0065(15) | 0.0050(15)  | 0.0044(14)  |
| C(2)  | 0.036(3)   | 0.029(2)   | 0.031(2)    | 0.0119(19) | 0.006(2)    | 0.016(2)    |
| C(3)  | 0.033(2)   | 0.022(2)   | 0.033(2)    | 0.0075(18) | 0.010(2)    | 0.0090(18)  |
| N(2)  | 0.0237(18) | 0.0197(17) | 0.0256(19)  | 0.0041(14) | 0.0043(15)  | 0.0037(14)  |
| C(4)  | 0.024(2)   | 0.036(3)   | 0.022(2)    | 0.0030(19) | 0.0035(18)  | 0.0036(19)  |
| C(5)  | 0.029(2)   | 0.035(3)   | 0.027(2)    | 0.0052(19) | 0.0062(19)  | 0.008(2)    |
| C(6)  | 0.034(3)   | 0.039(3)   | 0.029(3)    | 0.002(2)   | 0.007(2)    | 0.001(2)    |
| Si(1) | 0.0331(7)  | 0.0312(7)  | 0.0274(7)   | 0.0058(5)  | 0.0014(5)   | 0.0094(6)   |
| O(1)  | 0.038(2)   | 0.057(3)   | 0.040(2)    | 0.0199(19) | -0.0059(17) | 0.0041(19)  |
| C(7)  | 0.051(4)   | 0.076(5)   | 0.064(5)    | 0.025(4)   | -0.013(4)   | -0.018(4)   |
| O(2)  | 0.055(2)   | 0.041(2)   | 0.036(2)    | 0.0079(17) | 0.0092(18)  | 0.0228(19)  |
| C(8)  | 0.093(6)   | 0.050(4)   | 0.044(4)    | -0.003(3)  | 0.017(4)    | 0.033(4)    |
| O(3)  | 0.045(2)   | 0.037(2)   | 0.044(2)    | 0.0161(17) | 0.0093(18)  | 0.0134(17)  |
| C(9)  | 0.052(4)   | 0.045(3)   | 0.043(3)    | 0.011(3)   | 0.011(3)    | 0.002(3)    |
| C(10) | 0.026(2)   | 0.024(2)   | 0.023(2)    | 0.0016(17) | 0.0002(18)  | -0.0008(17) |
| C(11) | 0.035(3)   | 0.036(3)   | 0.039(3)    | 0.015(2)   | -0.008(2)   | -0.006(2)   |
| C(12) | 0.043(3)   | 0.028(3)   | 0.045(3)    | 0.007(2)   | 0.003(2)    | -0.003(2)   |
| C(13) | 0.025(2)   | 0.051(3)   | 0.058(4)    | 0.012(3)   | 0.015(2)    | 0.007(2)    |
| C(14) | 0.041(3)   | 0.027(2)   | 0.022(2)    | 0.0020(18) | 0.010(2)    | -0.002(2)   |
| C(15) | 0.026(2)   | 0.026(2)   | 0.029(2)    | 0.0055(18) | 0.0107(19)  | 0.0036(18)  |
| C(16) | 0.031(3)   | 0.037(3)   | 0.040(3)    | -0.001(2)  | 0.013(2)    | -0.004(2)   |
| C(17) | 0.037(3)   | 0.027(3)   | 0.070(4)    | 0.013(3)   | 0.012(3)    | -0.004(2)   |
| C(18) | 0.039(3)   | 0.018(2)   | 0.042(3)    | 0.004(2)   | 0.011(2)    | 0.0050(19)  |
| C(19) | 0.028(2)   | 0.022(2)   | 0.062(4)    | 0.018(2)   | 0.007(2)    | 0.0088(19)  |
| C(20) | 0.059(4)   | 0.042(3)   | 0.054(4)    | 0.018(3)   | -0.011(3)   | 0.012(3)    |
| C(21) | 0.050(3)   | 0.059(4)   | 0.035(3)    | 0.019(3)   | 0.002(3)    | 0.005(3)    |

**Table 5: Bond lengths (Å)**

|               |            |               |           |
|---------------|------------|---------------|-----------|
| Ir(1) - Cl(1) | 2.3582(13) | Si(1) - O(2)  | 1.623(4)  |
| Ir(1) - C(1)  | 2.052(4)   | Si(1) - O(3)  | 1.629(4)  |
| Ir(1) - C(14) | 2.112(5)   | O(1) - C(7)   | 1.430(8)  |
| Ir(1) - C(15) | 2.103(5)   | O(2) - C(8)   | 1.419(8)  |
| Ir(1) - C(18) | 2.176(5)   | O(3) - C(9)   | 1.435(7)  |
| Ir(1) - C(19) | 2.150(5)   | C(10) - C(11) | 1.521(7)  |
| C(1) - N(1)   | 1.357(6)   | C(10) - C(12) | 1.536(7)  |
| C(1) - N(2)   | 1.371(6)   | C(10) - C(13) | 1.523(7)  |
| N(1) - C(2)   | 1.379(6)   | C(14) - C(15) | 1.412(7)  |
| N(1) - C(4)   | 1.471(6)   | C(14) - C(21) | 1.539(8)  |
| C(2) - C(3)   | 1.326(7)   | C(15) - C(16) | 1.519(7)  |
| C(3) - N(2)   | 1.406(6)   | C(16) - C(17) | 1.511(8)  |
| N(2) - C(10)  | 1.497(6)   | C(17) - C(18) | 1.514(8)  |
| C(4) - C(5)   | 1.516(7)   | C(18) - C(19) | 1.380(8)  |
| C(5) - C(6)   | 1.544(7)   | C(19) - C(20) | 1.476(9)  |
| C(6) - Si(1)  | 1.844(5)   | C(20) - C(21) | 1.521(10) |
| Si(1) - O(1)  | 1.623(4)   |               |           |

Note – H atoms have been excluded

**Table 6: Bond angles (°)**

|                       |            |                       |          |
|-----------------------|------------|-----------------------|----------|
| Cl(1) - Ir(1) - C(1)  | 89.32(12)  | C(6) - Si(1) - O(2)   | 107.0(2) |
| Cl(1) - Ir(1) - C(14) | 164.20(15) | O(1) - Si(1) - O(2)   | 111.8(2) |
| C(1) - Ir(1) - C(14)  | 94.11(18)  | C(6) - Si(1) - O(3)   | 114.9(2) |
| Cl(1) - Ir(1) - C(15) | 156.40(14) | O(1) - Si(1) - O(3)   | 101.6(2) |
| C(1) - Ir(1) - C(15)  | 90.91(18)  | O(2) - Si(1) - O(3)   | 110.4(2) |
| C(14) - Ir(1) - C(15) | 39.1(2)    | Si(1) - O(1) - C(7)   | 123.0(4) |
| Cl(1) - Ir(1) - C(18) | 90.67(15)  | Si(1) - O(2) - C(8)   | 121.6(4) |
| C(1) - Ir(1) - C(18)  | 160.23(19) | Si(1) - O(3) - C(9)   | 123.4(4) |
| C(14) - Ir(1) - C(18) | 91.3(2)    | N(2) - C(10) - C(11)  | 111.4(4) |
| C(15) - Ir(1) - C(18) | 81.3(2)    | N(2) - C(10) - C(12)  | 109.5(4) |
| Cl(1) - Ir(1) - C(19) | 90.10(17)  | C(11) - C(10) - C(12) | 108.0(4) |
| C(1) - Ir(1) - C(19)  | 162.56(19) | N(2) - C(10) - C(13)  | 107.9(4) |
| C(14) - Ir(1) - C(19) | 82.0(2)    | C(11) - C(10) - C(13) | 110.4(5) |
| C(15) - Ir(1) - C(19) | 96.5(2)    | C(12) - C(10) - C(13) | 109.8(4) |
| C(18) - Ir(1) - C(19) | 37.2(2)    | Ir(1) - C(14) - C(15) | 70.1(3)  |
| Ir(1) - C(1) - N(1)   | 122.1(3)   | Ir(1) - C(14) - C(21) | 112.5(4) |
| Ir(1) - C(1) - N(2)   | 133.6(3)   | C(15) - C(14) - C(21) | 123.6(5) |
| N(1) - C(1) - N(2)    | 104.4(4)   | Ir(1) - C(15) - C(14) | 70.8(3)  |
| C(1) - N(1) - C(2)    | 111.6(4)   | Ir(1) - C(15) - C(16) | 113.2(3) |
| C(1) - N(1) - C(4)    | 125.0(4)   | C(14) - C(15) - C(16) | 124.0(5) |
| C(2) - N(1) - C(4)    | 123.3(4)   | C(15) - C(16) - C(17) | 113.3(4) |
| N(1) - C(2) - C(3)    | 107.1(4)   | C(16) - C(17) - C(18) | 114.3(4) |
| C(2) - C(3) - N(2)    | 107.6(4)   | Ir(1) - C(18) - C(17) | 112.3(4) |
| C(1) - N(2) - C(3)    | 109.4(4)   | Ir(1) - C(18) - C(19) | 70.4(3)  |
| C(1) - N(2) - C(10)   | 127.8(4)   | C(17) - C(18) - C(19) | 122.0(5) |
| C(3) - N(2) - C(10)   | 121.6(4)   | Ir(1) - C(19) - C(18) | 72.4(3)  |
| N(1) - C(4) - C(5)    | 113.1(4)   | Ir(1) - C(19) - C(20) | 110.6(4) |
| C(4) - C(5) - C(6)    | 109.5(4)   | C(18) - C(19) - C(20) | 127.1(6) |
| C(5) - C(6) - Si(1)   | 117.6(4)   | C(19) - C(20) - C(21) | 114.3(5) |
| C(6) - Si(1) - O(1)   | 111.2(2)   | C(14) - C(21) - C(20) | 113.4(5) |

Note – H atoms have been excluded
